# Supplementary material
Source: publisher figshare collection journal article supplement (https://gsapubs.figshare.com/ndownloader/files/33608318)
Supplement: Supplementary file 1 [file 33608318]

## Sheet: Table A3
Supplemental Material 3.
TABLE S3. THERMO-BAROMETRY AND HYGROMETRY CALCULATION RESULTS FOR POPOCATÉPETL VOLCANO (NEALTICAN LAVA FLOWS)
Sample	Flow unit	Olivine-liquid* (Eq. 22 from Putirka 2008)						Plagioclase-liquid* (Eq. 24a from Putirka 2008) and hygrometer (Waters and Lange 2015)								Orthopyroxene-liquid* (Eq. 28a and 29a from Putirka 2008)							Clinopyroxene-liquid* (Eq. 33 y 32c de Putirka 2008)							Fe-Ti oxides* (Ghiorso and Evans 2008)
		n	Liquid composition	T [°C]	stdev	P [MPa]†		n	Liquid composition	T [°C]	stdev	P [MPa]§	wt.% H2O	stdev		n	Liquid composition	T [°C]	stdev	P [MPa]	stdev		n	Liquid composition	T [°C]	stdev	P [MPa]	stdev		n	T [°C]	stdev
PO09	F1							1 (Core Pc)	Whole rock	1069	—	150	0.9	—									1 (Core Pc)	Whole rock	1074	—	440	—
		1 (Rim Pc)	Whole rock	1125	—	400		1 (Rim Pc)	Whole rock	1065	—	150	0.9	—									3 (Rim Pc+Mc)	Whole rock	1076	7.6	400	70
PO41	F1							1 (Core Pc)	Whole rock	1073	—	150	0.9	—									3 (Core Pc)	Whole rock	1071	4	360	50
		1 (Rim Pc)	Whole rock	1119	—	400		3 (Rim Pc+Mc)	Whole rock	1064	3.5	150	1	0.06									3 (Rim Pc+Mc)	Whole rock	1056	3.8	340	40
PO54	F2							3 (Core Pc+Mc)	Whole rock	1068	5.3	150	0.9	0.06									2 (Core Pc)	Whole rock	1075	20.5	370	130
		2 (Rim Pc)	Whole rock	1124	0.3	400		1 (Rim Pc)	Whole rock	1071	—	150	0.9	—									3 (Rim Pc)	Whole rock	1074	8.6	410	40
PO32	F3							2 (Core Pc)	Whole rock	1048	1.4	150	1.4	0		2 (Core Pc+Mc)	Whole rock	1055	1.3	250	160		1 (Core Pc)	Whole rock	1039	—	260	—
								4 (Rim Pc)	Whole rock	1055	4.2	150	1.3	0.05									1 (Rim Pc)	Whole rock	1037	—	200	—
PO28	F3							3 (Core Pc+Mc)	Whole rock	1048	1	150	1.3	0									1 (Core Mc)	Whole rock	1031	—	270	—
								3 (Rim Pc+Mc)	Whole rock	1049	2.5	150	1.3	0
PO18	F4							3 (Core Pc+Mc)	Whole rock	1046	2.5	150	1.3	0		1 (Core Mc)	Whole rock	1049	—	310	—									A pair Mg-il	925	—
								5 (Rim Pc+Mc)	Whole rock	1046	1.1	150	1.3	0									1 (Rim Mc)	Whole rock	1034	—	290	—
PO16	F4							3 (Core Pc+Mc)	Whole rock	1044	4.4	150	1.3	0.06									1 (Core Pc)	Whole rock	1040	—	360	—
								4 (Rim Pc+Mc)	Whole rock	1040	5.1	150	1.4	0.05									2 (Rim Mc)	Whole rock	1034	0.4	310	40
Abbreviations: Number of points analyzed (n), temperature (T), pressure (P), standard deviation (stdev), phenocrysts (Pc), micro-phenocrysts (Mc) and magnetite-ilmenite (Mg-il)
*Equilibrium data associated with crystals are reported.
†Pressure data of olivine from Witter et al. (2005) and Roberge et al. (2009).
§Pressure data of plagioclase from Witter et al. (2005), which is very similar to the experimental data obtained by Sosa-Ceballos et al. (2014).
